# Supplementary material for: Phytochemical Composition and Antioxidant, Anti-Acetylcholinesterase, and Anti-α-Glucosidase Activity of Thymus carnosus Extracts: A Three-Year Study on the Impact of Annual Variation and Geographic Location
Source: MDPI journal article supplement (doi:10.3390/antiox12030668), 2023-03-08
Supplement: s1 [file s1]

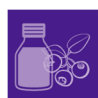

# Phytochemical Composition and Antioxidant, Anti-Acetylcholinesterase, and Anti- $\alpha$ -Glucosidase Activity of *Thymus carnosus* Extracts: A Three-Year Study on the Impact of Annual Variation and Geographic Location

Carlos Martins-Gomes <sup>1,2</sup>, Jan Steck <sup>3</sup>, Judith Keller <sup>3</sup>, Mirko Bunzel <sup>3</sup>, João A. Santos <sup>1,4</sup>, Fernando M. Nunes <sup>2,5</sup> and Amélia M. Silva <sup>1,6,\*</sup>

- <sup>1</sup> Centre for Research and Technology of Agro-Environmental and Biological Sciences (CITAB), University of Trás-os-Montes and Alto Douro (UTAD), Quinta de Prados, 5001-801 Vila Real, Portugal
- <sup>2</sup> Chemistry Research Centre - Vila Real (CQ-VR), UTAD, Quinta de Prados, 5001-801 Vila Real, Portugal
- <sup>3</sup> Department of Food Chemistry and Phytochemistry, Institute of Applied Biosciences, Karlsruhe Institute of Technology (KIT), Adenauerring 20a, 76131 Karlsruhe, Germany
- <sup>4</sup> Department of Physics, School of Sciences and Technology, UTAD, Quinta de Prados, 5001-801 Vila Real, Portugal
- <sup>5</sup> Department of Chemistry, School of Life and Environmental Sciences (ECVA), UTAD, Quinta de Prados, 5001-801 Vila Real, Portugal
- <sup>6</sup> Department of Biology and Environment, ECVA, UTAD, Quinta de Prados, 5001-801 Vila Real, Portugal
- \* Correspondence: amsilva@utad.pt; Tel.: +351-259-350-921

## Contents:

**Table S1.** Phytochemical composition of *T. carnosus* hydroethanolic (HE) extracts obtained by HPLC/DAD-ESI/MS<sup>n</sup> analysis

**Table S2.** Phytochemical composition of *T. carnosus* aqueous decoction (AD) extracts obtained by HPLC/DAD-ESI/MS<sup>n</sup> analysis.

**Figure S1.** Chromatograms of hydroethanolic (A) and aqueous decoction (B) extracts of *T. carnosus* obtained by HPLC-DAD.

**Figure S2.** Performance statistics for overall model, predictive components and orthogonal components for the correlation between ABTS<sup>•+</sup> scavenging and *T. carnosus* extracts' phytochemicals (A: HE extract; B: AD extract) and respective plots of model's validation. Sig.: significance.

**Figure S3.** Performance statistics for overall model, predictive components and orthogonal components for the correlation between HO<sup>•</sup> (A) and NO<sup>•</sup> (B) scavenging and *T. carnosus* AD extracts' phytochemicals and respective plots of model's validation. Sig.: significance.

**Figure S4.** Performance statistics for overall model, predictive components and orthogonal components for the correlation between  $\beta$ -carotene bleaching inhibition and *T. carnosus* extracts' phytochemicals (A: HE extract; B: AD extract) and respective plots of model's validation. Sig.: significance.

**Figure S5.** Performance statistics for overall model, predictive components and orthogonal components for the correlation between acetylcholinesterase inhibition and *T. carnosus* extracts' phytochemicals (A: HE extract; B: AD extract) and respective plots of model's validation. Sig.: significance.

**Figure S6.** Performance statistics for overall model, predictive components and orthogonal components for the correlation between  $\alpha$ -glucosidase inhibition and *T. carnosus* extracts' phytochemicals (A: HE extract; B: AD extract) and respective plots of model's validation. Sig.: significance.

**Table S1.** Phytochemical composition of *T. carnosus* hydroethanolic (HE) extracts obtained by HPLC/DAD-ESI/MS<sup>n</sup> analysis.

| Compound                                     | R.T. (min) | ESI-MS <sup>2</sup>       | Quantification (mg/g extract) |            |            |            |            |            |
|----------------------------------------------|------------|---------------------------|-------------------------------|------------|------------|------------|------------|------------|
|                                              |            |                           | 2018                          |            | 2019       |            | 2020       |            |
|                                              |            |                           | L1                            | L2         | L1         | L2         | L1         | L2         |
| 1 Apigenin-(6,8)-C-diglucoside               | 22.22±0.07 | [593]:575;503;473;383;353 | 0.49±0.08                     | 0.48±0.15  | 0.27±0.07  | 0.37±0.04  | 0.54±0.05  | 0.57±0.16  |
| 2 Hydroxyjasmonic acid-(?)-O-hexoside        | 22.50±0.05 | [387]:369;225;207;163     | n.q.                          | n.q.       | n.q.       | n.q.       | n.q.       | n.q.       |
| 3 Caffeic acid                               | 22.63±0.08 | [179]:135                 | 1.42±0.18                     | 1.58±0.23  | 1.41±0.09  | 1.20±0.09  | 1.28±0.01  | 1.23±0.15  |
| 4 Eriodictyol-(?)-O-hexoside isomer 1        | 23.03±0.01 | [449]:287                 | 1.61±0.21                     | 1.89±0.05  | 0.84±0.01  | 1.12±0.05  | 1.59±0.06  | 1.26±0.1   |
| 5 Unknown                                    | 24.35±0.37 | [443]:407;375;307;267;161 | n.q.                          | n.q.       | n.q.       | n.q.       | n.q.       | n.q.       |
| 6 Eriodictyol-(?)-O-hexoside isomer 2        | 25.47±0.06 | [449]:287                 | 2.22±0.24                     | 1.14±0.05  | 1.41±0.15  | 1.21±0.07  | 2.41±0.09  | 1.46±0.13  |
| 7 Quercetin-(?)-O-hexoside                   | 25.71±0.09 | [463]:301                 | 14.48±1.48                    | 12.74±2.08 | 21.21±0.35 | 12.63±1.51 | 25.92±0.95 | 15.14±2.14 |
| 8 Luteolin-(?)-O-hexoside isomer 1           | 27.22±0.06 | [447]:285                 | 0.45±0.07                     | 0.63±0.3   | 0.37±0.01  | 0.50±0.03  | 0.91±0.05  | 0.63±0.13  |
| 9 Luteolin-(?)-O-hexoside-(?)-O-pentoside    | 28.14±0.05 | [579]:477;285             | 0.66±0.09                     | 1.45±0.25  | 0.84±0.03  | 1.07±0.05  | 1.15±0.08  | 1.12±0.2   |
| 10 Luteolin-(?)-O-hexoside isomer 2          | 29.02±0.04 | [447]:285                 | 13.09±1.48                    | 15.84±1.61 | 14.56±0.70 | 13.04±0.83 | 19.63±0.75 | 16.28±1.62 |
| 11 Salvianolic acid B/E isomer 1             | 30.93±0.04 | [717]:555;519;475;357     | n.q.                          | n.q.       | n.q.       | n.q.       | n.q.       | n.q.       |
| 12 Salvianolic acid A isomer                 | 31.44±0.08 | [493]:383;313;295         | 15.16±2.29                    | 13.75±1.25 | 14.55±0.94 | 15.99±1.12 | 17.90±0.12 | 12.83±1.86 |
| 13 Apigenin-(?)-O-hexoside                   | 33.35±0.05 | [431]:269                 | n.q.                          | n.q.       | n.q.       | n.q.       | n.q.       | n.q.       |
| 14 Acetyl-luteolin-(?)-O-hexoside-pentoside  | 33.53±0.06 | [621]:579;561;447;327;285 | 0.99±0.10                     | 0.90±0.01  | 1.87±0.06  | 0.87±0.06  | 2.09±0.17  | 1.07±0.28  |
| 15 Rosmarinic acid                           | 32.62±0.03 | [359]:223;179;161         | 29.44±4.76                    | 19.99±2.01 | 21.90±1.62 | 23.24±1.72 | 26.64±0.12 | 22.17±2.88 |
| 16 Salvianolic acid K                        | 34.22±0.03 | [555]:537;493;359         | 9.82±1.52                     | 9.17±0.86  | 10.76±0.75 | 11.37±0.79 | 12.42±0.03 | 9.10±1.35  |
| 17 Salvianolic acid B/E isomer 2             | 34.61±0.04 | [717]:555;519;475;357     | 2.36±0.32                     | 2.55±0.65  | 3.16±0.18  | 2.34±0.17  | 3.49±0.07  | 2.32±0.42  |
| 18 Salvianolic acid A                        | 35.18±0.02 | [493]:295                 | n.q.                          | n.q.       | n.q.       | n.q.       | n.q.       | n.q.       |
| 19 Luteolin-(?)-O-hexoside-hexoside isomer 1 | 35.30±0.07 | [609]:447;323;285         | 1.97±0.25                     | 1.50±0.65  | 1.31±0.16  | 1.16±0.06  | 2.16±0.12  | 1.29±0.34  |
| 20 Quercetin-(?)-O-hexoside-hexuronide       | 36.11±0.03 | [639]:301                 | 1.83±0.16                     | 1.98±0.69  | 3.26±0.39  | 1.69±0.10  | 2.57±0.20  | 2.56±0.50  |
| 21 Luteolin-(?)-O-hexoside-hexoside isomer 2 | 39.83±0.13 | [609]:447;323;285         | 1.33±0.15                     | 1.58±0.43  | 1.69±0.09  | 1.27±0.09  | 1.68±0.24  | 1.82±0.14  |
| 22 Oleanolic acid <sup>a</sup>               |            |                           | 45.75±5.88                    | 34.85±3.64 | 48.14±1.88 | 45.16±4.44 | 55.80±2.30 | 41.30±3.22 |
| 23 Ursolic acid <sup>a</sup>                 |            |                           | 42.67±4.13                    | 38.58±4.24 | 40.53±1.54 | 46.80±4.32 | 51.84±3.12 | 40.52±3.45 |

|                                 |             |             |            |            |             |             |
|---------------------------------|-------------|-------------|------------|------------|-------------|-------------|
| <b>Total phenolic compounds</b> | 97.34±13.03 | 87.17±11.17 | 99.50±3.80 | 89.07±6.61 | 122.36±2.59 | 90.82±11.58 |
| <b>Total flavonoids</b>         | 39.17±4.09  | 40.13±6.15  | 47.71±0.65 | 34.94±2.83 | 60.63±2.46  | 43.20±5.34  |
| <b>Total phenolic acids</b>     | 58.20±9.03  | 47.01±5.02  | 51.79±3.51 | 54.14±3.89 | 61.73±0.19  | 47.61±6.53  |
| <b>Total terpenoids</b>         | 88.42±9.99  | 73.43±7.88  | 88.67±3.41 | 91.96±8.75 | 107.64±5.41 | 81.82±6.67  |

RT: retention time; ESI-MS<sup>2</sup> – Fragment ions obtained after fragmentation of the pseudo-molecular ion [M]<sup>+</sup>; n.q.: detected but not quantified; n.d.: not detected; <sup>a</sup> Identified and quantified by comparison to a commercial standard only. Results are presented as mean ± standard deviation. n = 3.

**Table S2.** Phytochemical composition of *T. carnosus* aqueous decoction (AD) extracts obtained by HPLC/DAD-ESI/MS<sup>n</sup> analysis.

| Compound                                    | R.T. (min) | ESI-MS <sup>2</sup>       | Quantification (mg/g extract) |           |            |           |            |           |
|---------------------------------------------|------------|---------------------------|-------------------------------|-----------|------------|-----------|------------|-----------|
|                                             |            |                           | 2018                          |           | 2019       |           | 2020       |           |
|                                             |            |                           | L1                            | L2        | L1         | L2        | L1         | L2        |
| 1 Apigenin-(6,8)-C-diglucoside              | 22.22±0.07 | [593]:575;503;473;383;353 | 0.53±0.01                     | 0.39±0.04 | 0.43±0.06  | 0.44±0.02 | 0.44±0.08  | 0.46±0.07 |
| 2 Hydroxyjasmonic acid-(?)-O-hexoside       | 22.50±0.05 | [387]:369;225;207;163     | n.q.                          | n.q.      | n.q.       | n.q.      | n.q.       | n.q.      |
| 3 Caffeic acid                              | 22.63±0.08 | [179]:135                 | 3.93±0.38                     | 2.79±0.21 | 4.10±0.13  | 3.12±0.19 | 3.03±0.19  | 2.74±0.05 |
| 4 Eriodictyol-(?)-O-hexoside isomer 1       | 23.03±0.01 | [449]:287                 | 1.88±0.09                     | 0.95±0.09 | 1.16±0.09  | 1.47±0.11 | 2.19±0.04  | 1.21±0.07 |
| 5 Unknown                                   | 24.35±0.37 | [443]:407;375;307;267;161 | n.q.                          | n.q.      | n.q.       | n.q.      | n.q.       | n.q.      |
| 6 Eriodictyol-(?)-O-hexoside isomer 2       | 25.47±0.06 | [449]:287                 | 1.99±0.09                     | 1.02±0.03 | 1.37±0.07  | 1.21±0.07 | 2.26±0.01  | 1.37±0.07 |
| 7 Quercetin-(?)-O-hexoside                  | 25.71±0.09 | [463]:301                 | 6.70±1.38                     | 3.10±0.01 | 19.48±0.35 | 3.79±0.38 | 11.42±0.59 | 4.38±0.62 |
| 8 Luteolin-(?)-O-hexoside isomer 1          | 27.22±0.06 | [447]:285                 | 0.80±0.13                     | 0.39±0.04 | 0.69±0.09  | 0.51±0.01 | 1.48±0.06  | 0.74±0.08 |
| 9 Luteolin-(?)-O-hexoside-(?)-O-pentoside   | 28.14±0.05 | [579]:477;285             | 1.01±0.01                     | 1.07±0.16 | 1.41±0.16  | 1.03±0.01 | 1.54±0.05  | 0.98±0.07 |
| 10 Luteolin-(?)-O-hexoside isomer 2         | 29.02±0.04 | [447]:285                 | 8.80±1.11                     | 6.28±0.50 | 11.82±1.08 | 7.56±0.06 | 13.82±0.50 | 8.66±0.74 |
| 11 Salvianolic acid B/E isomer 1            | 30.93±0.04 | [717]:555;519;475;357     | n.q.                          | n.q.      | n.q.       | n.q.      | n.q.       | n.q.      |
| 12 Salvianolic acid A isomer                | 31.44±0.08 | [493]:383;313;295         | 8.66±0.89                     | 6.57±0.47 | 12.24±0.62 | 8.39±0.30 | 10.59±0.30 | 7.52±0.57 |
| 13 Apigenin-(?)-O-hexoside                  | 33.35±0.05 | [431]:269                 | n.q.                          | n.q.      | n.q.       | n.q.      | n.q.       | n.q.      |
| 14 Acetyl-luteolin-(?)-O-hexoside-pentoside | 33.53±0.06 | [621]:579;561;447;327;285 | 1.01±0.08                     | 0.54±0.02 | 2.17±0.24  | 0.65±0.01 | 1.66±0.05  | 0.76±0.04 |
| 15 Rosmarinic acid                          | 32.62±0.03 | [359]:223;179;161         | 11.00±2.42                    | 4.48±0.89 | 20.12±0.29 | 6.67±0.56 | 10.94±0.63 | 8.08±1.25 |
| 16 Salvianolic acid K                       | 34.22±0.03 | [555]:537;493;359         | 8.16±0.53                     | 5.74±0.18 | 13.80±0.75 | 7.86±0.41 | 10.32±0.43 | 6.70±0.57 |

|                                 |                                           |            |                       |            |            |            |            |            |            |
|---------------------------------|-------------------------------------------|------------|-----------------------|------------|------------|------------|------------|------------|------------|
| 17                              | Salvianolic acid B/E isomer 2             | 34.61±0.04 | [717]:555;519;475;357 | 1.90±0.16  | 4.15±0.40  | 2.50±0.10  | 1.12±0.04  | 1.39±0.02  | 1.36±0.12  |
| 18                              | Salvianolic acid A                        | 35.18±0.02 | [493]:295             | n.q.       | n.q.       | n.q.       | n.q.       | n.q.       | n.q.       |
| 19                              | Luteolin-(?)-O-hexoside-hexoside isomer 1 | 35.30±0.07 | [609]:447;323;285     | 2.74±0.09  | 1.58±0.26  | 2.08±0.22  | 1.61±0.04  | 2.85±0.23  | 1.48±0.07  |
| 20                              | Quercetin-(?)-O-hexoside-hexuronide       | 36.11±0.03 | [639]:301             | 1.60±0.13  | 1.12±0.09  | 3.99±0.39  | 1.33±0.01  | 2.26±0.22  | 1.61±0.14  |
| 21                              | Luteolin-(?)-O-hexoside-hexoside isomer 2 | 39.83±0.13 | [609]:447;323;285     | 1.07±0.07  | 0.82±0.06  | 1.94±0.25  | 0.98±0.07  | 1.33±0.21  | 1.06±0.06  |
| 22                              | Oleanolic acid <sup>a</sup>               |            |                       | n.d.       | n.d.       | n.d.       | n.d.       | n.d.       | n.d.       |
| 23                              | Ursolic acid <sup>a</sup>                 |            |                       | n.d.       | n.d.       | n.d.       | n.d.       | n.d.       | n.d.       |
| <b>Total phenolic compounds</b> |                                           |            |                       | 61.78±6.28 | 37.96±1.15 | 99.86±4.13 | 48.02±0.15 | 78.63±3.25 | 48.86±4.75 |
| <b>Total flavonoids</b>         |                                           |            |                       | 28.14±2.65 | 17.24±0.12 | 45.69±2.10 | 20.58±0.17 | 41.24±1.88 | 23.76±0.86 |
| <b>Total phenolic acids</b>     |                                           |            |                       | 33.65±3.62 | 20.70±1.27 | 54.17±2.03 | 27.43±0.32 | 37.39±1.62 | 26.40±2.44 |
| <b>Total terpenoids</b>         |                                           |            |                       | n.d.       | n.d.       | n.d.       | n.d.       | n.d.       | n.d.       |

RT: retention time; ESI-MS<sup>2</sup> – Fragment ions obtained after fragmentation of the pseudo-molecular ion [M]<sup>+</sup>; n.q.: detected but not quantified; n.d.: not detected; <sup>a</sup> Identified and quantified by comparison to a commercial standard only. Results are presented as mean ± standard deviation. n = 3.

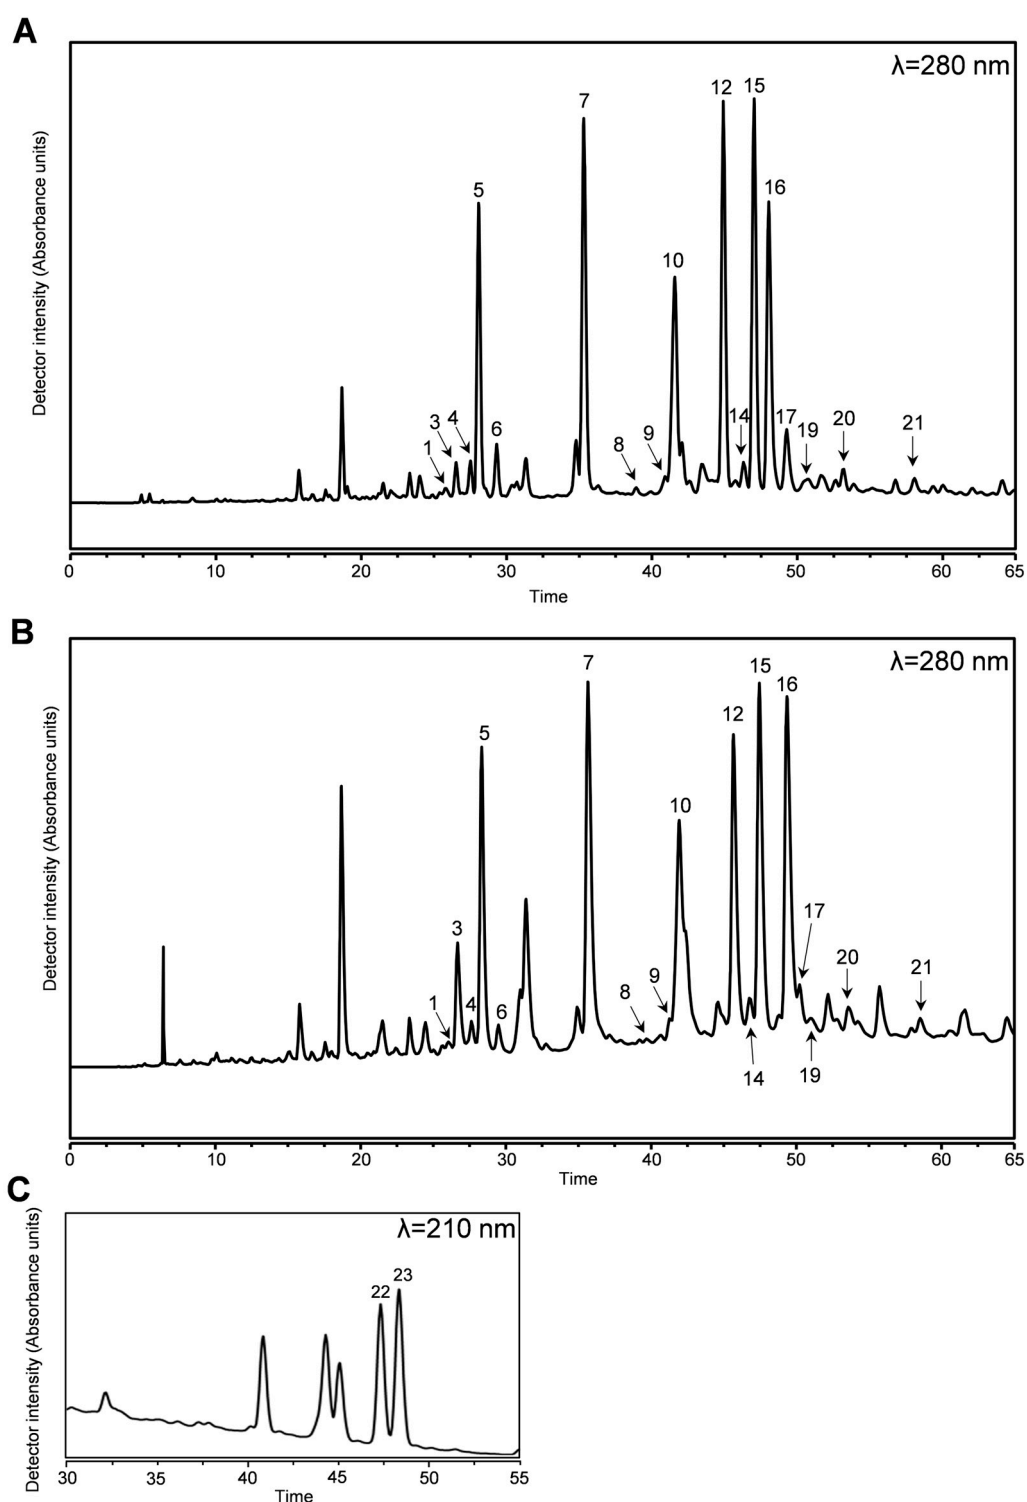

**Figure S1.** Chromatograms of hydroethanolic (A) and aqueous decoction (B) extracts of *T. carnosus* obtained by HPLC-DAD. This are examples of the chromatograms used for phytochemicals' quantification, obtained at 280 nm for polyphenolic compounds, and the chromatogram used for terpenoids quantification at 210 nm (C) in the hydroethanolic extract. For peak identification please refer to Supplementary tables S1 and S2. Compounds not identified in these chromatograms were identified in HPLC-ESI-MS<sup>n</sup> analysis but not in the HPLC-DAD chromatogram used for quantification.

A

| Component             | R2X    | R2X (cum) | Eigenvalue | R2    | R2 (cum) | Q2    | Limit | Q2 (cum) | R2Y | R2Y (cum) | Eigenvalue Y | Sig. |
|-----------------------|--------|-----------|------------|-------|----------|-------|-------|----------|-----|-----------|--------------|------|
| Model                 |        | 0,648     |            |       | 0,886    |       |       | 0,647    |     | 1         |              |      |
| Predictive            |        | 0,282     |            |       | 0,886    |       |       | 0,647    |     | 1         |              |      |
| P1                    | 0,282  | 0,282     | 5,07       | 0,886 | 0,886    | 0,647 | 0,01  | 0,647    | 1   | 1         | 1            | R1   |
| Orthogonal in X(OPLS) |        | 0,366     |            |       | 0        |       |       |          |     |           |              |      |
| O1                    | 0,266  | 0,266     | 4,8        | 0     | 0        |       |       |          |     |           |              | R1   |
| O2                    | 0,0997 | 0,366     | 1,79       | 0     | 0        |       |       |          |     |           |              | R1   |

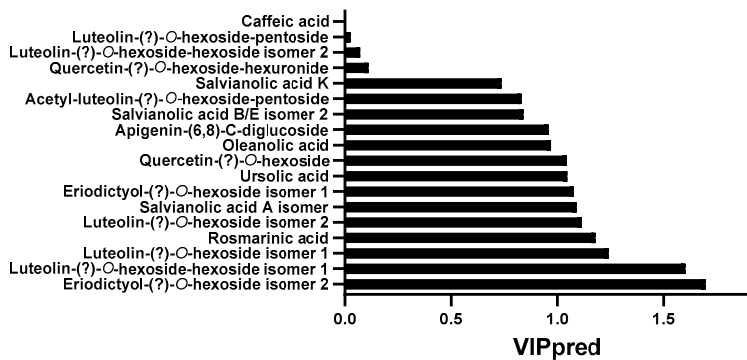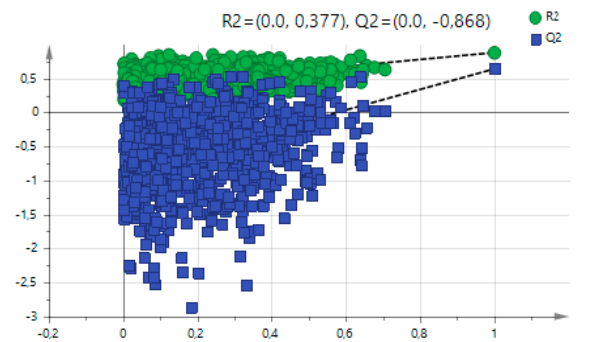

B

| Component  | R2X   | R2X (cum) | Eigenvalue | R2    | R2 (cum) | Q2    | Limit | Q2 (cum) | R2Y | R2Y (cum) | Eigenvalue Y | Sig. |
|------------|-------|-----------|------------|-------|----------|-------|-------|----------|-----|-----------|--------------|------|
| Model      |       | 0,643     |            |       | 0,874    |       |       | 0,847    |     | 1         |              |      |
| Predictive |       | 0,643     |            |       | 0,874    |       |       | 0,847    |     | 1         |              |      |
| P1         | 0,643 | 0,643     | 10,3       | 0,874 | 0,874    | 0,847 | 0,01  | 0,847    | 1   | 1         | 1            | R1   |

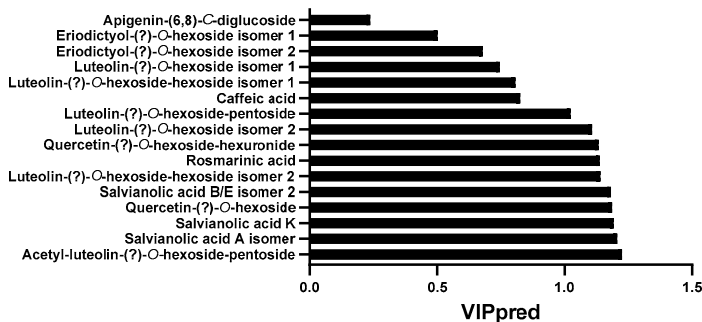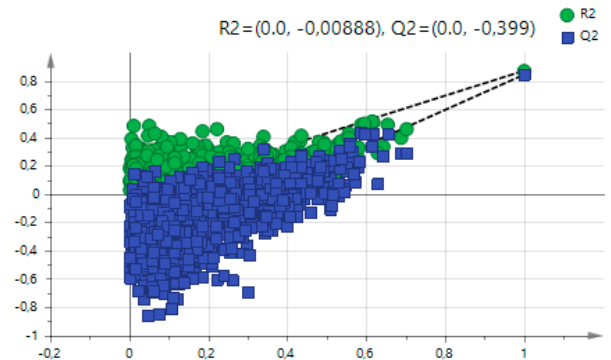

**Figure S2.** Performance statistics for overall model, predictive components and orthogonal components for the correlation between ABTS<sup>•+</sup> scavenging and *T. carnosus* extracts' phytochemicals (A: HE extract; B: AD extract) and respective plots of model's validation. Sig.: significance.

A

| Component             | R2X   | R2X (cum) | Eigenvalue | R2   | R2 (cum) | Q2   | Limit | Q2 (cum) | R2Y | R2Y (cum) | Eigenvalue Y | Sig. |
|-----------------------|-------|-----------|------------|------|----------|------|-------|----------|-----|-----------|--------------|------|
| Model                 |       | 0,93      |            |      | 0,871    |      |       | 0,795    |     | 1         |              |      |
| Predictive            |       | 0,473     |            |      | 0,871    |      |       | 0,795    |     | 1         |              |      |
| P1                    | 0,473 | 0,473     | 7,57       | 0,87 | 0,871    | 0,79 | 0,01  | 0,795    | 1   | 1         | 1            | R1   |
| Orthogonal in X(OPLS) |       | 0,457     |            |      | 0        |      |       |          |     |           |              |      |
| O1                    | 0,271 | 0,271     | 4,33       | 0    | 0        |      |       |          |     |           |              | R1   |
| O2                    | 0,186 | 0,457     | 2,98       | 0    | 0        |      |       |          |     |           |              | R1   |

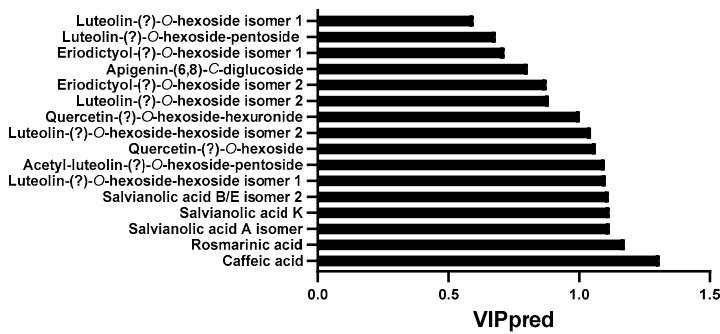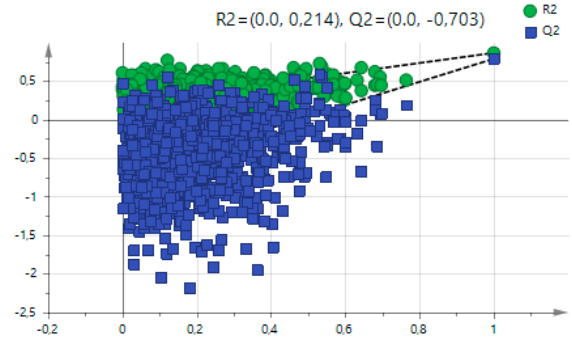

B

| Component  | R2X   | R2X (cum) | Eigenvalue | R2    | R2 (cum) | Q2    | Limit | Q2 (cum) | R2Y | R2Y (cum) | Eigenvalue Y | Sig. |
|------------|-------|-----------|------------|-------|----------|-------|-------|----------|-----|-----------|--------------|------|
| Model      |       | 0,642     |            |       | 0,787    |       |       | 0,773    |     | 1         |              |      |
| Predictive |       | 0,642     |            |       | 0,787    |       |       | 0,773    |     | 1         |              |      |
| P1         | 0,642 | 0,642     | 10,3       | 0,787 | 0,787    | 0,773 | 0,01  | 0,773    | 1   | 1         | 1            | R1   |

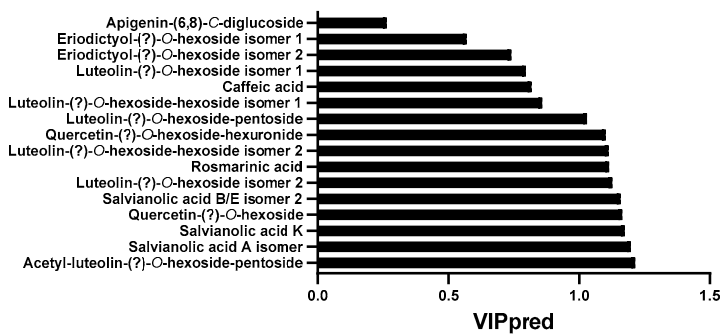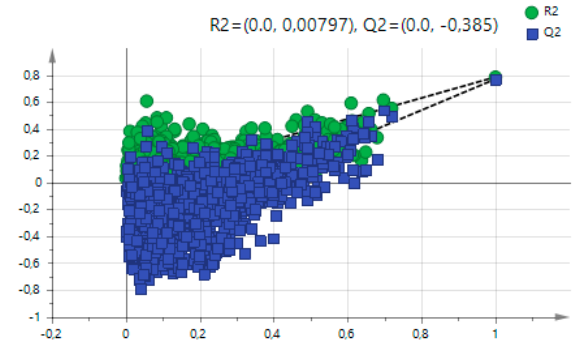

**Figure S3.** Performance statistics for overall model, predictive components and orthogonal components for the correlation between HO• (A) and NO• (B) scavenging and *T. carnosus* AD extracts' phytochemicals and respective plots of model's validation. Sig.: significance.

A

| Component             | R2X   | R2X (cum) | Eigenvalue | R2   | R2 (cum) | Q2   | Limit | Q2 (cum) | R2Y | R2Y (cum) | Eigenvalue Y | Sig. |
|-----------------------|-------|-----------|------------|------|----------|------|-------|----------|-----|-----------|--------------|------|
| Model                 |       | 0,587     |            |      | 0,877    |      |       | 0,773    |     | 1         | 0,587        |      |
| Predictive            |       | 0,289     |            |      | 0,877    |      |       | 0,773    |     | 1         |              |      |
| P1                    | 0,289 | 0,289     | 5,2        | 0,87 | 0,877    | 0,77 | 0,01  | 0,773    | 1   | 1         | 1            | R1   |
| Orthogonal in X(OPLS) |       | 0,298     |            |      | 0        |      |       |          |     |           |              |      |
| O1                    | 0,298 | 0,298     | 5,36       | 0    | 0        |      |       |          |     |           |              | R1   |

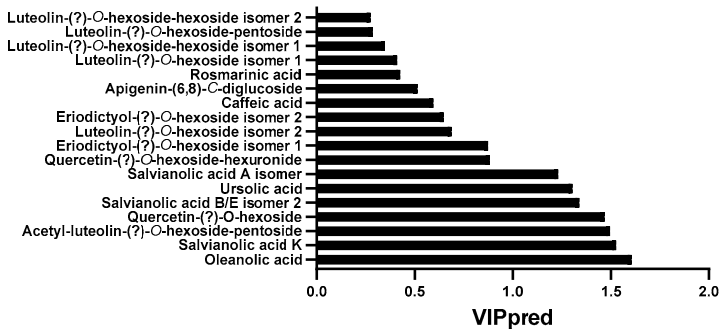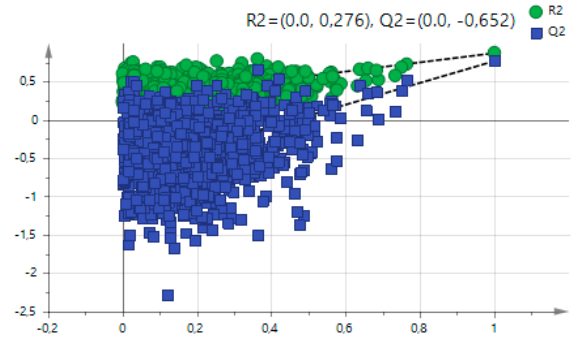

B

| Component             | R2X    | R2X (cum) | Eigenvalue | R2    | R2 (cum) | Q2    | Limit | Q2 (cum) | R2Y | R2Y (cum) | Eigenvalue Y | Sig. |
|-----------------------|--------|-----------|------------|-------|----------|-------|-------|----------|-----|-----------|--------------|------|
| Model                 |        | 0,978     |            |       | 0,887    |       |       | 0,665    |     | 1         |              |      |
| Predictive            |        | 0,066     |            |       | 0,887    |       |       | 0,665    |     | 1         | 0,066        |      |
| P1                    | 0,066  | 0,066     | 1,06       | 0,887 | 0,887    | 0,665 | 0,01  | 0,665    | 1   | 1         | 1            | R1   |
| Orthogonal in X(OPLS) |        | 0,912     |            |       | 0        |       |       |          |     |           |              |      |
| O1                    | 0,592  | 0,592     | 9,47       | 0     | 0        |       |       |          |     |           |              | R1   |
| O2                    | 0,151  | 0,743     | 2,42       | 0     | 0        |       |       |          |     |           |              | R1   |
| O3                    | 0,138  | 0,881     | 2,21       | 0     | 0        |       |       |          |     |           |              | R1   |
| O4                    | 0,0312 | 0,912     | 0,499      | 0     | 0        |       |       |          |     |           |              | R1   |

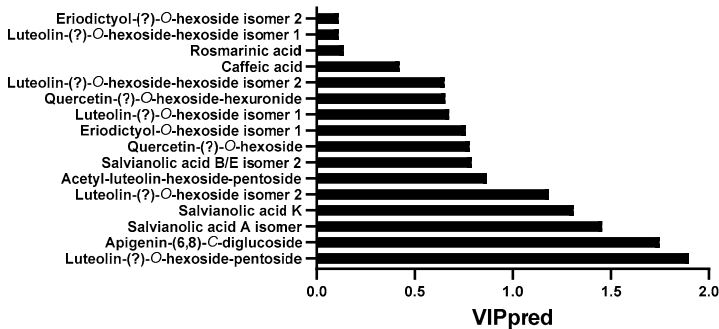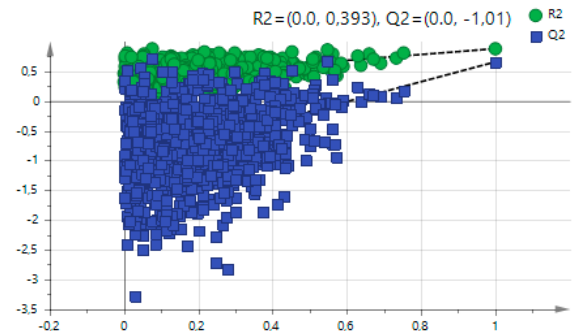

**Figure S4.** Performance statistics for overall model, predictive components and orthogonal components for the correlation between  $\beta$ -carotene bleaching inhibition and *T. carnosus* extracts' phytochemicals (A: HE extract; B: AD extract) and respective plots of model's validation. Sig.: significance.



A

| Component             | R2X   | R2X (cum) | Eigenvalue | R2   | R2 (cum) | Q2   | Limit | Q2 (cum) | R2Y | R2Y (cum) | Eigenvalue Y | Sig. |
|-----------------------|-------|-----------|------------|------|----------|------|-------|----------|-----|-----------|--------------|------|
| Model                 |       | 0,592     |            |      | 0,715    |      |       | 0,23     |     | 1         | 0,592        |      |
| Predictive            |       | 0,133     |            |      | 0,715    |      |       | 0,23     |     | 1         | 0,133        |      |
| P1                    | 0,133 | 0,133     | 2,39       | 0,71 | 0,715    | 0,23 | 0,01  | 0,23     | 1   | 1         | 1            | R1   |
| Orthogonal in X(OPLS) |       | 0,459     |            |      | 0        |      |       |          |     |           |              |      |
| O1                    | 0,364 | 0,364     | 6,56       | 0    | 0        |      |       |          |     |           |              | NS   |
| O2                    | 0,094 | 0,459     | 1,7        | 0    | 0        |      |       |          |     |           |              | R1   |

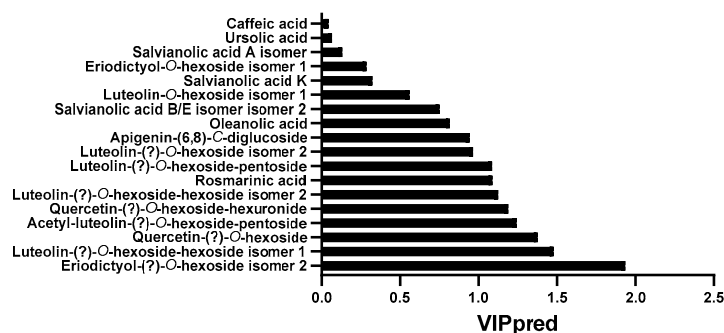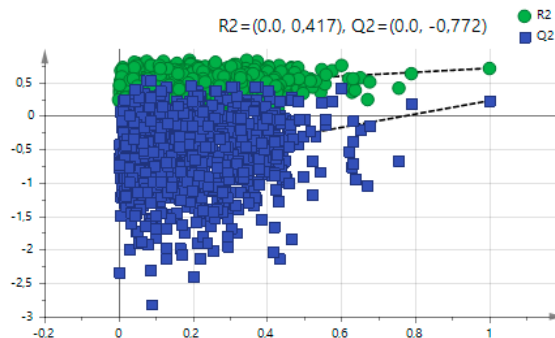

B

| Component             | R2X    | R2X (cum) | Eigenvalue | R2    | R2 (cum) | Q2    | Limit | Q2 (cum) | R2Y | R2Y (cum) | Eigenvalue Y | Sig. |
|-----------------------|--------|-----------|------------|-------|----------|-------|-------|----------|-----|-----------|--------------|------|
| Model                 |        | 0,981     |            |       | 0,825    |       |       | 0,517    |     | 1         |              |      |
| Predictive            |        | 0,12      |            |       | 0,825    |       |       | 0,517    |     | 1         | 0,12         |      |
| P1                    | 0,12   | 0,12      | 1,92       | 0,825 | 0,825    | 0,517 | 0,01  | 0,517    | 1   | 1         | 1            | R1   |
| Orthogonal in X(OPLS) |        | 0,861     |            |       | 0        |       |       |          |     |           |              |      |
| O1                    | 0,6    | 0,6       | 9,61       | 0     | 0        |       |       |          |     |           |              | R1   |
| O2                    | 0,165  | 0,765     | 2,64       | 0     | 0        |       |       |          |     |           |              | R1   |
| O3                    | 0,0686 | 0,834     | 1,1        | 0     | 0        |       |       |          |     |           |              | R1   |
| O4                    | 0,0273 | 0,861     | 0,437      | 0     | 0        |       |       |          |     |           |              | R1   |

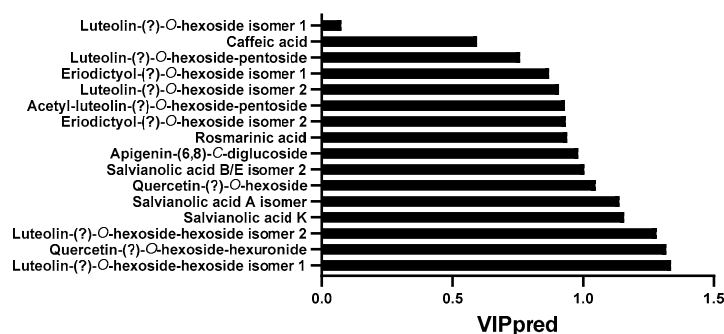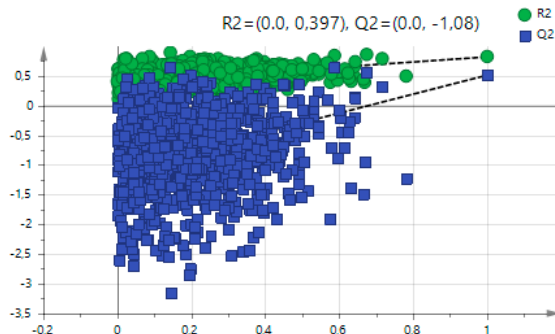

**Figure S5.** Performance statistics for overall model, predictive components and orthogonal components for the correlation between acetylcholinesterase inhibition and *T. carnosus* extracts' phytochemicals (A: HE extract; B: AD extract) and respective plots of model's validation. Sig.: significance.

A

| Component             | R2X        | R2X (cum) | Eigenvalue | R2   | R2 (cum) | Q2   | Limit | Q2 (cum) | R2Y | R2Y (cum) | Eigenvalue Y | Sig. |
|-----------------------|------------|-----------|------------|------|----------|------|-------|----------|-----|-----------|--------------|------|
| Model                 |            | 0,756     |            |      | 0,924    |      |       | 0,744    |     | 1         |              |      |
| Predictive            |            | 0,143     |            |      | 0,924    |      |       | 0,744    |     | 1         |              |      |
| P1                    | 0,143      | 0,143     | 2,57       | 0,92 | 0,924    | 0,74 | 0,01  | 0,744    | 1   | 1         | 1            | R1   |
| Orthogonal in X(OPLS) |            | 0,614     |            |      | 0        |      |       |          |     |           |              |      |
| O1                    | 0,404      | 0,404     | 7,27       | 0    | 0        |      |       |          |     |           |              | R1   |
| O2                    | 0,133      | 0,537     | 2,39       | 0    | 0        |      |       |          |     |           |              | R1   |
| O3                    | 0,077<br>2 | 0,614     | 1,39       | 0    | 0        |      |       |          |     |           |              | R1   |

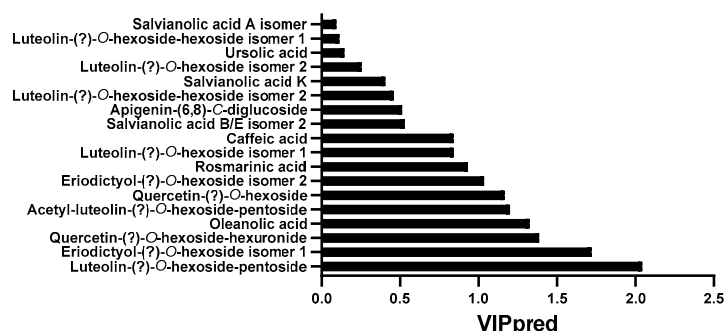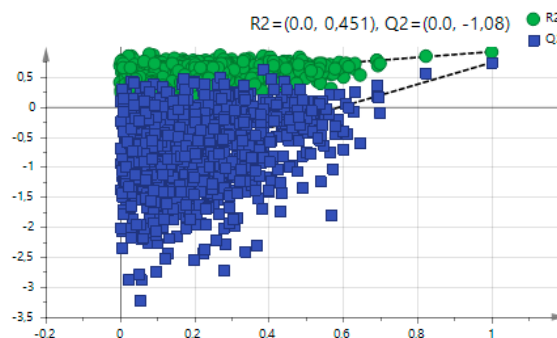

B

| Component  | R2X   | R2X (cum) | Eigenvalue | R2    | R2 (cum) | Q2    | Limit | Q2 (cum) | R2Y | R2Y (cum) | Eigenvalue Y | Sig. |
|------------|-------|-----------|------------|-------|----------|-------|-------|----------|-----|-----------|--------------|------|
| Model      |       | 0.639     |            |       | 0.728    |       |       | 0.653    |     | 1         |              |      |
| Predictive |       | 0.639     |            |       | 0.728    |       |       | 0.653    |     | 1         |              |      |
| P1         | 0.639 | 0.639     | 10.2       | 0,728 | 0,728    | 0,653 | 0,01  | 0,653    | 1   | 1         | 1            | R1   |

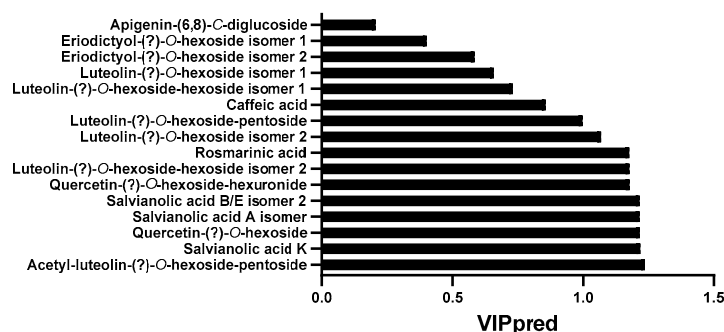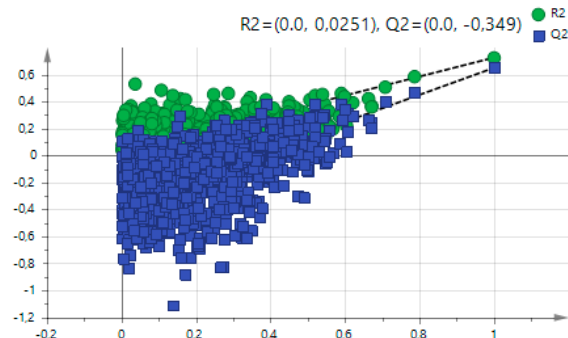

**Figure S6.** Performance statistics for overall model, predictive components and orthogonal components for the correlation between  $\alpha$ -glucosidase inhibition and *T. carnosus* extracts' phytochemicals (A: HE extract; B: AD extract) and respective plots of model's validation. Sig.: significance.
